# Supplementary material
Source: PubMed Central journal article supplement (PMC4314195)
Supplement: bph0172-1059-sd2.pdf [file bph0172-1059-sd2.pdf]

# Molecular mechanisms governing different pharmacokinetics of ginsenosides and potential for ginsenoside-perpetrated herb-drug interactions on OATP1B3

Rongrong Jiang, Jiajia Dong, Xiuxue Li, Feifei Du, Weiwei Jia, Fang Xu, Fengqing Wang, Junling Yang, Wei Niu, Chuan Li  
*British Journal of Pharmacology* (DOI:10.1111/bph.12971)

## - Supporting Information Appendix S2 -

### Protein expression of OATP1B1, OATP1B3 and Oatp1b2 in transfected HEK293 cells and mRNA levels of MRP2, BCRP, BSEP, MDR1, Mrp2, Bcrp and Bsep in membrane vesicles

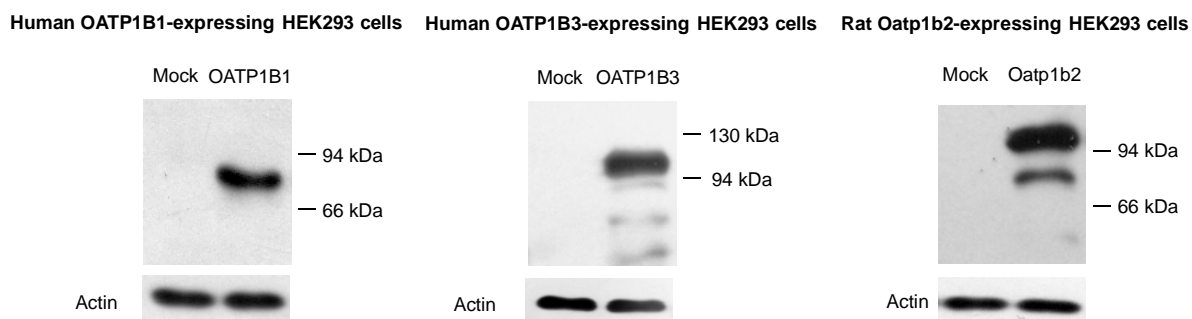

**Figure 1**

The protein expression of human OATP1B1, human OATP1B3 and rat Oatp1b2 in transfected HEK293 cells and mock cells. The western blotting analysis is described in Supplemental Methods.

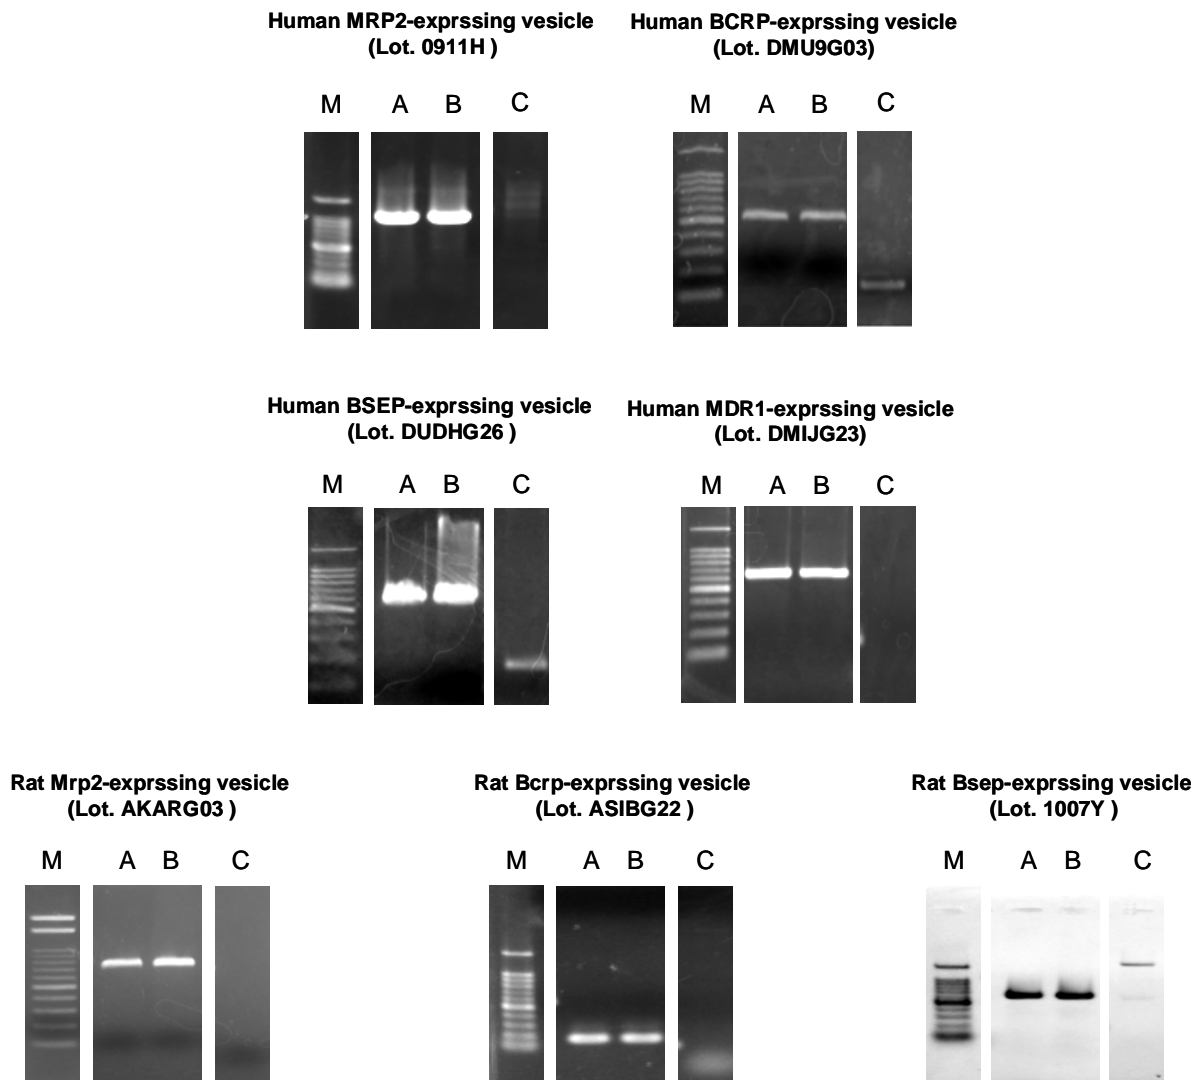

**Figure 2**

The mRNA levels of human MRP2, human BCRP, human BSEP, human MDR1, rat Mrp2, rat Bcrp and rat Bsep in membrane vesicles obtained from Genomembrane (Kanazawa, Japan). M, A, B and C represent the standard DNA maker, the mixture of three vials with the same batch number, positive control (the same vesicle products that prepared before and were already functionally verified) and negative control (Cat. No. GM0003), respectively. These mRNA data were kindly provided by Genomembrane.
