# Supplementary material
Source: PubMed Central journal article supplement (PMC4314195)
Supplement: bph0172-1059-sd3.pdf [file bph0172-1059-sd3.pdf]

# Molecular mechanisms governing different pharmacokinetics of ginsenosides and potential for ginsenoside-perpetrated herb-drug interactions on OATP1B3

Rongrong Jiang, Jiajia Dong, Xiuxue Li, Feifei Du, Weiwei Jia, Fang Xu, Fengqing Wang, Junling Yang, Wei Niu, Chuan Li

*British Journal of Pharmacology* (DOI:10.1111/bph.12971)

## - Supporting Information Appendix S3 -

### Time courses for accumulation of the ppt-type ginsenosides in HEK293 cells expressing human OATP1B3 or rat Oatp1b2

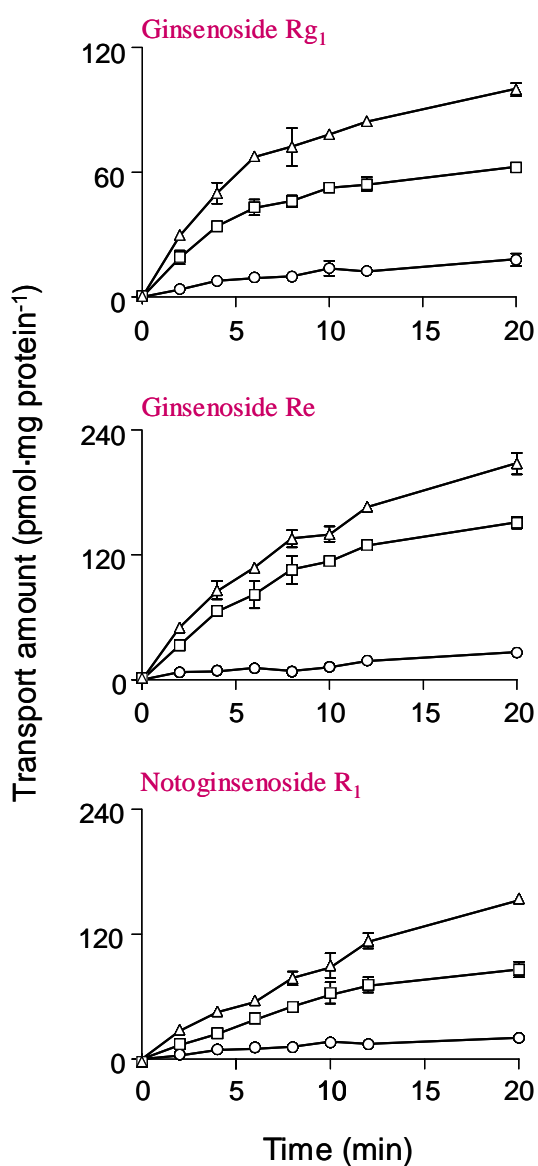

**Figure 1**

Time courses for accumulation of ginsenoside Rg<sub>1</sub>, ginsenoside Re and notoginsenoside R<sub>1</sub> in HEK293 cells expressing pcDNA vector (circle), human OATP1B3 (square) or rat Oatp1b2 (triangle). The initial concentrations of ginsenosides used for incubation were 50  $\mu$ M. Data represent the means and standard errors and each time point was performed in triplicate.
