# Supplementary material
Source: PubMed Central journal article supplement (PMC4314195)
Supplement: bph0172-1059-sd5.pdf [file bph0172-1059-sd5.pdf]

# Molecular mechanisms governing different pharmacokinetics of ginsenosides and potential for ginsenoside-perpetrated herb-drug interactions on OATP1B3

Rongrong Jiang, Jiajia Dong, Xiuxue Li, Feifei Du, Weiwei Jia, Fang Xu, Fengqing Wang, Junling Yang, Wei Niu, Chuan Li

*British Journal of Pharmacology* (DOI:10.1111/bph.12971)

## - Supporting Information Appendix S5 - Rat tissue distribution of ginsenosides

**Table 1**

Tissue distribution of ginsenosides after i.v. administration at 2.5  $\mu\text{mol}\cdot\text{kg}^{-1}$  in rats treated with and without rifampin at 20  $\text{mg}\cdot\text{kg}^{-1}$

| Parameters                              | Ppt-type                    |                    |                   |                    |                                |                    | Ppd-type                    |                 |                 |
|-----------------------------------------|-----------------------------|--------------------|-------------------|--------------------|--------------------------------|--------------------|-----------------------------|-----------------|-----------------|
|                                         | Ginsenoside Rg <sub>1</sub> |                    | Ginsenoside Re    |                    | Notoginsenoside R <sub>1</sub> |                    | Ginsenoside Rb <sub>1</sub> | Ginsenoside Rc  | Ginsenoside Rd  |
|                                         | (-) Rif                     | (+) Rif            | (-) Rif           | (+) Rif            | (-) Rif                        | (+) Rif            | (-) Rif                     | (-) Rif         | (-) Rif         |
| <b>Plasma data</b>                      |                             |                    |                   |                    |                                |                    |                             |                 |                 |
| C <sub>5min</sub> ( $\mu\text{M}$ )     | 6.30 $\pm$ 0.80             | 10.7 $\pm$ 1.4*    | 4.38 $\pm$ 0.48   | 5.28 $\pm$ 0.30*   | 6.33 $\pm$ 1.21                | 8.27 $\pm$ 0.44*   | 64.8 $\pm$ 6.8              | 57.0 $\pm$ 1.8  | 29.0 $\pm$ 1.2  |
| AUC <sub>0-t</sub> (h· $\mu\text{M}$ )  | 1.29 $\pm$ 0.20             | 3.65 $\pm$ 0.32*   | 0.938 $\pm$ 0.210 | 2.79 $\pm$ 0.17*   | 2.85 $\pm$ 0.34                | 4.40 $\pm$ 0.42*   | 237 $\pm$ 58                | 221 $\pm$ 4     | 92.3 $\pm$ 5.9  |
| AUC <sub>0-∞</sub> (h· $\mu\text{M}$ )  | 1.30 $\pm$ 0.21             | 3.66 $\pm$ 0.33*   | 0.942 $\pm$ 0.212 | 2.80 $\pm$ 0.17*   | 2.86 $\pm$ 0.34                | 4.41 $\pm$ 0.43*   | 590 $\pm$ 215               | 517 $\pm$ 32    | 136 $\pm$ 14    |
| t <sub>1/2</sub> (h)                    | 0.121 $\pm$ 0.027           | 0.412 $\pm$ 0.094* | 0.273 $\pm$ 0.154 | 0.549 $\pm$ 0.031* | 0.483 $\pm$ 0.015              | 0.820 $\pm$ 0.251* | 9.00 $\pm$ 4.38             | 10.3 $\pm$ 0.5  | 4.88 $\pm$ 0.47 |
| MRT (h)                                 | 0.178 $\pm$ 0.040           | 0.469 $\pm$ 0.112* | 0.198 $\pm$ 0.086 | 0.562 $\pm$ 0.043* | 0.455 $\pm$ 0.097              | 0.686 $\pm$ 0.169* | 12.9 $\pm$ 6.2              | 14.6 $\pm$ 0.8  | 6.94 $\pm$ 0.71 |
| <b>Heart data</b>                       |                             |                    |                   |                    |                                |                    |                             |                 |                 |
| C <sub>5(15)min</sub> ( $\mu\text{M}$ ) | 1.02 $\pm$ 0.15             | 1.24 $\pm$ 0.04    | 0.723 $\pm$ 0.103 | 0.667 $\pm$ 0.103  | 0.824 $\pm$ 0.199              | 1.32 $\pm$ 0.11*   | 5.11 $\pm$ 0.47             | 3.99 $\pm$ 0.37 | 2.42 $\pm$ 0.36 |
| AUC <sub>0-t</sub> (h· $\mu\text{M}$ )  | 0.361 $\pm$ 0.019           | 0.572 $\pm$ 0.143  | 0.147 $\pm$ 0.010 | 0.389 $\pm$ 0.029* | 0.352 $\pm$ 0.026              | 0.581 $\pm$ 0.112* | 23.6 $\pm$ 2.6              | 19.0 $\pm$ 0.3  | 12.4 $\pm$ 0.8  |
| AUC <sub>0-∞</sub> (h· $\mu\text{M}$ )  | 0.370 $\pm$ 0.013           | 0.611 $\pm$ 0.129* | 0.167 $\pm$ 0.034 | 0.413 $\pm$ 0.036* | 0.391 $\pm$ 0.008              | 0.670 $\pm$ 0.124* | 48.1 $\pm$ 5.5              | 33.4 $\pm$ 2.9  | 27.6 $\pm$ 4.9  |
| t <sub>1/2</sub> (h)                    | 0.172 $\pm$ 0.081           | 0.361 $\pm$ 0.067* | 0.172 $\pm$ 0.040 | 1.017 $\pm$ 0.101* | 0.298 $\pm$ 0.064              | 0.312 $\pm$ 0.119  | 8.00 $\pm$ 0.90             | 6.67 $\pm$ 0.80 | 9.23 $\pm$ 1.48 |
| MRT (h)                                 | 0.251 $\pm$ 0.103           | 0.481 $\pm$ 0.052* | 0.216 $\pm$ 0.033 | 1.112 $\pm$ 0.193* | 0.427 $\pm$ 0.094              | 0.452 $\pm$ 0.183  | 11.7 $\pm$ 1.1              | 9.55 $\pm$ 1.09 | 13.3 $\pm$ 2.1  |

| <b>Liver data</b>          |               |                |               |                |               |                |               |               |               |
|----------------------------|---------------|----------------|---------------|----------------|---------------|----------------|---------------|---------------|---------------|
| C <sub>5(15)min</sub> (µM) | 8.44 ± 1.40   | 1.51 ± 0.27*   | 4.28 ± 0.28   | 1.12 ± 0.10*   | 7.38 ± 1.02   | 1.32 ± 0.09*   | 5.43 ± 0.46   | 4.53 ± 0.31   | 3.48 ± 0.33   |
| AUC <sub>0-t</sub> (h·µM)  | 2.03 ± 0.15   | 0.660 ± 0.021* | 1.77 ± 0.09   | 0.675 ± 0.105* | 2.60 ± 0.30   | 0.797 ± 0.062* | 24.1 ± 2.1    | 20.9 ± 1.5    | 17.2 ± 0.8    |
| AUC <sub>0-∞</sub> (h·µM)  | 2.08 ± 0.15   | 0.781 ± 0.039* | 1.86 ± 0.08   | 0.742 ± 0.121* | 2.91 ± 0.37   | 1.10 ± 0.11*   | 62.6 ± 12.6   | 70.6 ± 22.2   | 42.6 ± 13.4   |
| t <sub>1/2</sub> (h)       | 0.182 ± 0.013 | 0.339 ± 0.028* | 0.225 ± 0.016 | 0.593 ± 0.057* | 0.431 ± 0.213 | 0.533 ± 0.068  | 11.9 ± 3.1    | 16.4 ± 8.0    | 10.8 ± 5.5    |
| MRT (h)                    | 0.251 ± 0.020 | 0.491 ± 0.052* | 0.325 ± 0.023 | 0.861 ± 0.089* | 0.532 ± 0.195 | 0.770 ± 0.101  | 17.1 ± 4.4    | 23.6 ± 11.4   | 15.6 ± 7.8    |
| <b>Kidney data</b>         |               |                |               |                |               |                |               |               |               |
| C <sub>5(15)min</sub> (µM) | 7.62 ± 0.32   | 9.32 ± 0.35*   | 9.58 ± 1.89   | 17.0 ± 1.3*    | 14.6 ± 2.2    | 23.1 ± 6.1     | 6.17 ± 0.22   | 4.88 ± 1.15   | 4.08 ± 0.48   |
| AUC <sub>0-t</sub> (h·µM)  | 6.94 ± 0.24   | 13.2 ± 1.5*    | 4.98 ± 0.47   | 14.0 ± 1.4*    | 13.6 ± 2.0    | 21.9 ± 2.6*    | 24.4 ± 2.9    | 24.2 ± 0.5    | 16.9 ± 4.1    |
| AUC <sub>0-∞</sub> (h·µM)  | 10.4 ± 2.3    | 21.8 ± 3.2*    | 6.81 ± 1.19   | 17.7 ± 0.7*    | 17.2 ± 4.1    | 26.7 ± 3.2*    | 69.5 ± 11.3   | 105 ± 24      | 39.6 ± 10.6   |
| t <sub>1/2</sub> (h)       | 5.69 ± 3.41   | 4.67 ± 3.05    | 7.14 ± 2.55   | 4.19 ± 0.53    | 5.80 ± 2.14   | 3.69 ± 0.22    | 16.6 ± 7.8    | 20.9 ± 5.4    | 8.14 ± 3.12   |
| MRT (h)                    | 7.01 ± 4.25   | 6.41 ± 3.16    | 7.86 ± 3.32   | 4.69 ± 0.92    | 6.31 ± 1.91   | 4.34 ± 0.26    | 19.3 ± 6.3    | 30.2 ± 7.7    | 11.8 ± 4.4    |
| <b>Lung data</b>           |               |                |               |                |               |                |               |               |               |
| C <sub>5(15)min</sub> (µM) | 1.67 ± 0.31   | 1.92 ± 0.16    | 1.64 ± 0.53   | 1.92 ± 0.30    | 2.01 ± 0.54   | 2.87 ± 0.15    | 5.21 ± 0.24   | 4.57 ± 0.49   | 3.53 ± 0.44   |
| AUC <sub>0-t</sub> (h·µM)  | 0.701 ± 0.020 | 1.12 ± 0.07*   | 0.417 ± 0.106 | 1.056 ± 0.268* | 1.20 ± 0.24*  | 1.74 ± 0.14*   | 30.4 ± 1.8    | 25.8 ± 0.3    | 17.5 ± 0.5    |
| AUC <sub>0-∞</sub> (h·µM)  | 0.712 ± 0.019 | 1.12 ± 0.07*   | 0.433 ± 0.105 | 1.11 ± 0.24*   | 1.24 ± 0.25*  | 1.78 ± 0.14*   | 136 ± 57      | 81.2 ± 15.3   | 40.9 ± 10.5   |
| t <sub>1/2</sub> (h)       | 2.11 ± 0.63   | 1.09 ± 0.18*   | 0.386 ± 0.296 | 0.618 ± 0.274  | 0.769 ± 0.061 | 0.763 ± 0.063  | 21.7 ± 9.7    | 14.4 ± 3.5    | 9.90 ± 3.40   |
| MRT (h)                    | 0.897 ± 0.047 | 0.770 ± 0.061* | 0.503 ± 0.397 | 0.749 ± 0.273  | 0.807 ± 0.158 | 0.869 ± 0.085  | 31.2 ± 14.0   | 20.9 ± 4.9    | 14.3 ± 4.8    |
| <b>Brain data</b>          |               |                |               |                |               |                |               |               |               |
| C <sub>5(15)min</sub> (µM) | 0.063 ± 0.017 | 0.081 ± 0.017* | 0.050 ± 0.001 | 0.113 ± 0.067  | 0.05 ± 0.01   | 0.058 ± 0.005  | 0.345 ± 0.078 | 0.330 ± 0.014 | 0.303 ± 0.055 |
| AUC <sub>0-t</sub> (h·µM)  | 0.025 ± 0.003 | 0.038 ± 0.010* | 0.078 ± 0.012 | 0.126 ± 0.021* | 0.08 ± 0.01   | 0.108 ± 0.014* | 1.17 ± 0.11   | 1.30 ± 0.17   | 0.92 ± 0.32   |
| AUC <sub>0-∞</sub> (h·µM)  | 0.028 ± 0.005 | 0.047 ± 0.010* | 0.132 ± 0.011 | 0.189 ± 0.020* | 0.15 ± 0.01   | 0.184 ± 0.011* | 2.02 ± 0.37   | 2.47 ± 0.52   | 1.12 ± 0.55   |
| t <sub>1/2</sub> (h)       | 0.299 ± 0.080 | 0.372 ± 0.151  | 3.007 ± 0.484 | 3.05 ± 2.79    | 3.90 ± 0.33   | 4.01 ± 2.18    | 6.00 ± 2.45   | 7.07 ± 1.54   | 2.95 ± 1.19   |
| MRT (h)                    | 0.430 ± 0.117 | 0.538 ± 0.223  | 4.422 ± 0.690 | 3.93 ± 3.35    | 5.61 ± 0.54   | 5.96 ± 3.66    | 9.10 ± 3.66   | 10.4 ± 2.47   | 4.37 ± 1.62   |

Three rats per group. (-) Rif, rats free of rifampin treatment. (+) Rif, rats treated with Rifampin. \*, P < 0.05.
