# Supplementary material
Source: PubMed Central journal article supplement (PMC4314195)
Supplement: bph0172-1059-sd6.pdf [file bph0172-1059-sd6.pdf]

# Molecular mechanisms governing different pharmacokinetics of ginsenosides and potential for ginsenoside-perpetrated herb-drug interactions on OATP1B3

Rongrong Jiang, Jiajia Dong, Xiuxue Li, Feifei Du, Weiwei Jia, Fang Xu, Fengqing Wang, Junling Yang, Wei Niu, Chuan Li  
*British Journal of Pharmacology* (DOI:10.1111/bph.12971)

## - Supporting Information Appendix S6 - Content levels of ginsenosides in herbal injections

### *Experimental*

**Freeze-dried XueShuanTong for injection** was a ginsenoside extract of *Panax notoginseng* roots (Sanqi) in the form of dried powder (to be made into solution when ready to use) and was available as a sterile, nonpyrogenic parenteral dosage form for intravenous injection. The freeze-dried XueShuanTong for injection was manufactured by Guangxi Wuzhou Pharmaceutical (Group) Co., Ltd. (Wuzhou, China) with a China Food and Drug Administration ratification no. (GuoYaoZhunZi) Z20025652. **ShenMai injection** was a solution of extract of steamed *Panax notoginseng* roots (red ginseng) and *Ophiopogon japonicus* roots (Maidong) available as a sterile, nonpyrogenic parenteral dosage form for intravenous injection, which was manufactured by Shineway Pharmaceutical Co., Ltd. (Shijiazhuang, China) with a China Food and Drug Administration ratification no. (GuoYaoZhunZi) Z13020887. **ShengMai injection** was a solution of extract of steamed *Panax notoginseng* roots (red ginseng), *Ophiopogon japonicus* roots (Maidong) and *Schisandra chinensis* fruits (Wuweizi) available as a sterile, nonpyrogenic parenteral dosage form for intravenous injection, which was manufactured by Shanghai Hutchison Pharmaceutical Co., Ltd. (Shanghai, China) with a China Food and Drug Administration ratification no. (GuoYaoZhunZi) Z31020219. **Shenfu injection** was a solution of extract of steamed *Panax notoginseng* roots (red ginseng) and processed *Aconitum carmichaeli* daughter roots (Fuzi) available as a sterile, nonpyrogenic parenteral dosage form for intravenous injection, which was manufactured by Ya'an Sanjiu Pharmaceutical Co., Ltd. (Ya'an, China) with a China Food and Drug Administration ratification no. (GuoYaoZhunZi) Z20043117.

### *Results*

The content levels of ginsenosides in herbal injections are shown in [Table 1](#).

**Table 1**

Content levels of ginsenosides in herbal injections.

| <b>Compound</b>                    | <b>Freeze-dried<br/>XueShuanTong<br/>for injection<br/>(<math>\mu\text{mol}\cdot\text{day}^{-1}</math> per person)</b> | <b>ShenMai<br/>injection</b> | <b>ShengMai<br/>injection</b> | <b>ShengFu<br/>injection</b> |
|------------------------------------|------------------------------------------------------------------------------------------------------------------------|------------------------------|-------------------------------|------------------------------|
| <b><i>Ppt-type ginsenoside</i></b> |                                                                                                                        |                              |                               |                              |
| Ginsenoside Rg <sub>1</sub>        | 364 ± 7                                                                                                                | 6.96 ± 0.25                  | 20.6 ± 0.5                    | 23.5 ± 1.7                   |
| Ginsenoside Re                     | 44.2 ± 2.1                                                                                                             | 2.48 ± 0.02                  | 6.31 ± 0.01                   | 10.4 ± 0.1                   |
| Notoginsenoside R <sub>1</sub>     | 75.0 ± 0.5                                                                                                             | —                            | 0.94 ± 0.01                   | 0.93 ± 0.05                  |
| <b><i>Ppd-type ginsenoside</i></b> |                                                                                                                        |                              |                               |                              |
| Ginsenoside Rb <sub>1</sub>        | 159 ± 1                                                                                                                | 37.6 ± 0.9                   | 20.7 ± 0.1                    | 19.1 ± 0.2                   |
| Ginsenoside Rc                     | 0.0387 ± 0.0027                                                                                                        | 12.7 ± 0.1                   | 6.46 ± 0.14                   | 7.79 ± 0.13                  |
| Ginsenoside Rd                     | 7.78 ± 0.13                                                                                                            | 9.20 ± 0.07                  | 4.73 ± 0.05                   | 6.33 ± 0.21                  |
